# Supplementary material for: Evidencias arqueológicas sobre la muerte en el Camino de Santiago
Source: PLOS journal article supplement (doi:10.1371/journal.pone.0156499), 2010-01-01
Supplement: S6 (10.1371/journal.pone.0156499.s006) [file journal.pone.0156499.s006]

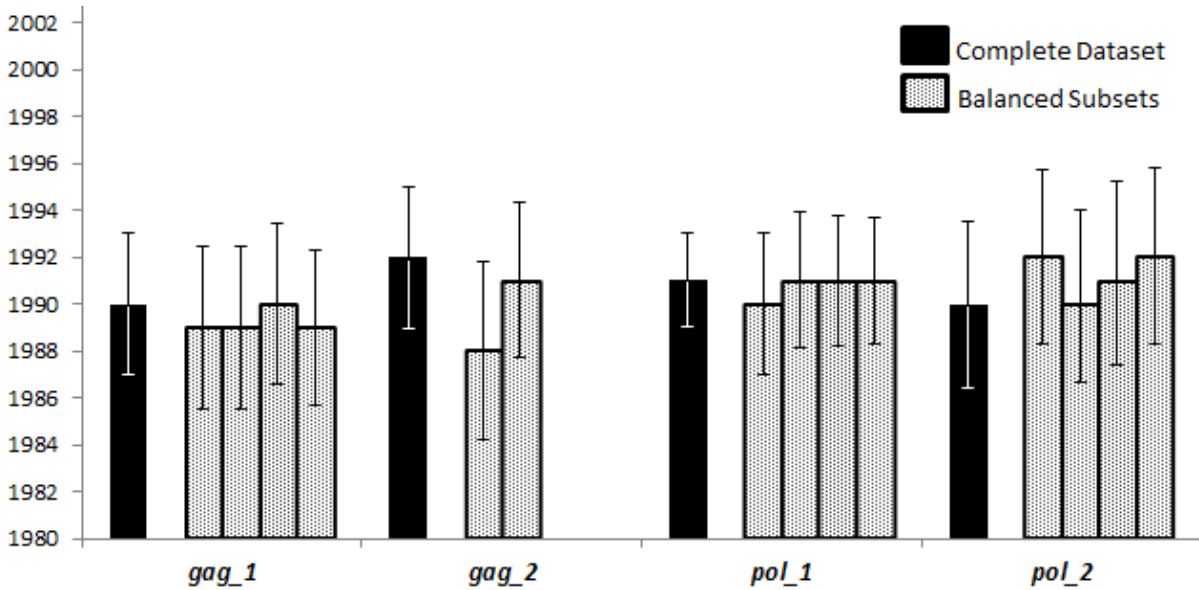

**S6 Fig. Robustness of the CRF35\_AD<sub>Afghan-Iranian</sub> cluster's dating estimates to the choice of different datasets.** Vertical box refers to mean parameter estimates and error bars represent the corresponding 95% Bayesian credible intervals. As shown in the figure, Bayesian credible intervals of all dating estimates overlap, supporting the robustness of this parameter to the choice of different datasets. In the *gag\_2* region, the total number of sequences available from Iran was small (n=21); therefore, only two balanced subsets were created and analyzed for this region. The color code in the upper right corner indicates the type of datasets.
